# Supplementary material for: Protomer alignment modulates specificity of RNA substrate recognition by Ire1
Source: eLife. 2021 Apr 27;10:e67425. doi: 10.7554/eLife.67425 (PMC8104961; doi:10.7554/eLife.67425)
Supplement: Figure 2—source data 1. — The oligomer interface is referred as the interface IF2C and the back-to-back dimer interface is referred as the interface IF1C in Korennykh et al., 2009. [file elife-67425-fig2-data1.xlsx]

## Sheet: Sheet1
Sc residue	Sc position	Sp residue	Sp position	location
K	992	D	950	dimer interface
N	1001	E	959	HLE
M	1010	Q	968	HLE
T	1032	S	989	oligomer interface
F	1033	L	990	oligomer interface
E	1038	G	995	HLE (on HLE)
R	1039	K	996	HLE (on HLE)
H	1044	D	1001	HLE
S	1045	G	1002	HLE
M	1049	L	1006	HLE
Y	1059	R	1016	dimer interface
F	1062	Y	1019	dimer interface
M	1063	Q	1020	dimer interface
I	1069	V	1026	oligomer interface
A	1070	R	1027	oligomer interface
E	1071	R	1028	oligomer interface
L	1109	F	1066	dimer interface
