# Supplementary material for: Protomer alignment modulates specificity of RNA substrate recognition by Ire1
Source: eLife. 2021 Apr 27;10:e67425. doi: 10.7554/eLife.67425 (PMC8104961; doi:10.7554/eLife.67425)
Supplement: Figure 3—source data 1. — ‘Y’ indicates the mutation is present in the corresponding Ire1 construct. ‘N’ indicates the mutation is absent in the corresponding Ire1 construct. [file elife-67425-fig3-data1.xlsx]

## Sheet: Sheet1
	K992D	N1001E	M1010Q	T1032S	F1033L	E1038G	R1039K	H1044D	S1045G	M1049L	Y1059R	F1062Y	M1063Q	I1069V	A1070R	E1071R	L1109F
Sc Ire1 KR	N	N	N	N	N	N	N	N	N	N	N	N	N	N	N	N	N
Sc Ire1 KR mut-17	Y	Y	Y	Y	Y	Y	Y	Y	Y	Y	Y	Y	Y	Y	Y	Y	Y
rev mut 1	N	Y	Y	Y	Y	Y	Y	Y	Y	Y	Y	Y	Y	Y	Y	Y	Y
rev mut 2	Y	N	Y	Y	Y	Y	Y	Y	Y	Y	Y	Y	Y	Y	Y	Y	Y
rev mut 3	Y	Y	N	Y	Y	Y	Y	Y	Y	Y	Y	Y	Y	Y	Y	Y	Y
rev mut 4	Y	Y	Y	N	Y	Y	Y	Y	Y	Y	Y	Y	Y	Y	Y	Y	Y
rev mut 5	Y	Y	Y	Y	N	Y	Y	Y	Y	Y	Y	Y	Y	Y	Y	Y	Y
rev mut 6	Y	Y	Y	Y	Y	N	Y	Y	Y	Y	Y	Y	Y	Y	Y	Y	Y
rev mut 7	Y	Y	Y	Y	Y	Y	N	Y	Y	Y	Y	Y	Y	Y	Y	Y	Y
rev mut 8	Y	Y	Y	Y	Y	Y	Y	N	Y	Y	Y	Y	Y	Y	Y	Y	Y
rev mut 9	Y	Y	Y	Y	Y	Y	Y	Y	N	Y	Y	Y	Y	Y	Y	Y	Y
rev mut 10	Y	Y	Y	Y	Y	Y	Y	Y	Y	N	Y	Y	Y	Y	Y	Y	Y
rev mut 11	Y	Y	Y	Y	Y	Y	Y	Y	Y	Y	N	Y	Y	Y	Y	Y	Y
rev mut 12	Y	Y	Y	Y	Y	Y	Y	Y	Y	Y	Y	N	Y	Y	Y	Y	Y
rev mut 13	Y	Y	Y	Y	Y	Y	Y	Y	Y	Y	Y	Y	N	Y	Y	Y	Y
rev mut 14	Y	Y	Y	Y	Y	Y	Y	Y	Y	Y	Y	Y	Y	N	Y	Y	Y
rev mut 15	Y	Y	Y	Y	Y	Y	Y	Y	Y	Y	Y	Y	Y	Y	N	Y	Y
rev mut 16	Y	Y	Y	Y	Y	Y	Y	Y	Y	Y	Y	Y	Y	Y	Y	N	Y
rev mut 17	Y	Y	Y	Y	Y	Y	Y	Y	Y	Y	Y	Y	Y	Y	Y	Y	N
Sc Ire1 KR mut-3	Y	N	N	N	N	N	N	Y	N	N	Y	N	N	N	N	N	N
Sc Ire1 KR mut-IF	Y	N	N	N	N	N	N	N	N	N	Y	N	N	N	N	N	N
Sc Ire1 KR mut-HLE	N	N	N	N	N	N	N	Y	N	N	N	N	N	N	N	N	N
"N": the mutation is absent in the Ire1 construct
"Y": the mutation is present in the Ire1 construct
