# Supplementary material for: Protomer alignment modulates specificity of RNA substrate recognition by Ire1
Source: eLife. 2021 Apr 27;10:e67425. doi: 10.7554/eLife.67425 (PMC8104961; doi:10.7554/eLife.67425)
Supplement: Figure 5—source data 1. — Their residues at three positions, which correspond to the S. cerevisiae Ire1 E988, K992 and Y1059, are listed. [file elife-67425-fig5-data1.xlsx]

## Sheet: Sheet1
Accession	Genus	Species	position 988	position 992	position 1059
XP_001701292.1	Chlamydomonas	reinhardtii	G	D	R
XP_015647365.1	Oryza	sativa	S	D	S
NP_187793.1	Arabidopsis	thaliana	F	E	L
NP_565419.1	Arabidopsis	thaliana	S	D	L
XP_004232580.1	Solanum	lycopersicum	S	D	L
XP_010320476.1	Solanum	lycopersicum	S	D	L
NP_001190383.1	Arabidopsis	thaliana	S	D	L
XP_024394149.1	Physcomitrella	patens	S	K	S
XP_024400803.1	Physcomitrella	patens	S	K	S
NP_001254135.1	Caenorhabditis	elegans	A	D	K
NP_001097839.1	Drosophila	melanogaster	S	D	K
XP_001919350.3	Danio	rerio	Q	D	K
XP_011240120.1	Mus	musculus	Q	D	K
XP_011544011.1	Homo	sapiens	Q	D	K
XP_014981286.2	Macaca	mulatta	Q	D	K
XP_016879837.1	Homo	sapiens	Q	D	K
XP_001109583.2	Macaca	mulatta	Q	D	K
NP_076402.1	Mus	musculus	Q	D	K
T551_00711	Pneumocystis	jirovecii	S	D	K
PNEG_00510	Pneumocystis	murina	S	D	K
T552_00346	Pneumocystis	carinii	S	D	K
SJAG_04435	Schizosaccharomyces	japonicus	D	D	K
SPAC167.01	Schizosaccharomyces	pombe	D	D	R
SOCG_02371	Schizosaccharomyces	octosporus	D	D	R
SPOG_04905	Schizosaccharomyces	cryophilus	D	D	R
GSTUM_00011029001	Tuber	melanosporum	A	D	K
AOL_s00054g793	Arthrobotrys	oligospora	N	D	K
AN0235.2	Aspergillus	nidulans	S	D	R
ANI_1_848014	Aspergillus	niger	S	D	R
ATEG_04924	Aspergillus	terreus	A	D	R
AFLA_081860	Aspergillus	flavus	T	D	C
AOR_1_1640174	Aspergillus	oryzae	T	D	C
ANOM_005293	Aspergillus	nomius	T	D	C
NFIA_022920	Aspergillus	fischeri	S	D	R
AFUA_1G01720	Aspergillus	fumigatus	S	D	R
ACLA_032800	Aspergillus	clavatus	S	D	R
Pc22g22480	Penicillium	rubens	T	D	R
PEX2_017860	Penicillium	expansum	T	D	R
PDIP_62820	Penicillium	digitatum	T	D	R
PADG_08047	Paracoccidioides	brasiliensis	N	D	R
PAAG_06070	Paracoccidioides	lutzii	N	D	R
HCAG_03304	Histoplasma	capsulatum	N	D	R
BDBG_03970	Blastomyces	gilchristii	S	D	R
MCYG_05475	Arthroderma	otae	S	D	R
MGYG_06531	Nannizzia	gypsea	S	D	R
TERG_06654	Trichophyton	rubrum	S	D	R
TRV_07737	Trichophyton	verrucosum	S	D	R
ARB_07150	Trichophyton	benhamiae	S	D	R
CIMG_09916	Coccidioides	immitis	S	D	R
CPC735_011230	Coccidioides	posadasii	S	D	R
UREG_06057	Uncinocarpus	reesii	G	D	R
T310_4211	Rasamsonia	emersonii	S	D	R
TSTA_040740	Talaromyces	stipitatus	S	D	R
PMAA_008830	Talaromyces	marneffei	N	D	R
EPUS_05859	Endocarpon	pusillum	D	E	K
Z518_10443	Rhinocladiella	mackenziei	E	D	K
A1O5_06021	Cladophialophora	psammophila	E	D	K
Z519_04715	Cladophialophora	bantiana	E	D	K
PV07_09293	Cladophialophora	immunda	E	D	K
Z520_06457	Fonsecaea	multimorphosa	E	D	K
Z517_02332	Fonsecaea	pedrosoi	E	D	K
AYL99_10695	Fonsecaea	erecta	E	D	K
G647_10077	Cladophialophora	carrionii	E	D	K
A1O7_01747	Cladophialophora	yegresii	E	D	K
PV05_01800	Exophiala	xenobiotica	E	D	K
PV08_04820	Exophiala	spinifera	E	D	K
PV06_06147	Exophiala	oligosperma	E	D	K
HMPREF1120_00610	Exophiala	dermatitidis	E	D	K
A1O1_09058	Capronia	coronata	E	D	K
A1O3_07671	Capronia	epimyces	R	D	M
A1O9_12540	Exophiala	aquamarina	E	D	K
PV10_02303	Exophiala	mesophila	D	D	K
HMPREF1541_06688	Cyphellophora	europaea	D	D	K
AB675_548	Phialophora	attae	D	D	K
L228DRAFT_243362	Xylona	heveae	N	D	K
W97_05938	Coniosporium	apollinis	N	D	K
UCRNP2_4405	Neofusicoccum	parvum	T	Q	K
PV09_07167	Verruconis	gallopava	N	D	K
CC84DRAFT_1102081	Paraphaeosphaeria	sporulosa	T	D	K
SNOG_03584	Parastagonospora	nodorum	N	D	K
LEMA_P062990.1	Leptosphaeria	maculans	N	D	K
CC77DRAFT_1067491	Alternaria	alternata	D	D	K
SETTUDRAFT_24549	Setosphaeria	turcica	D	D	K
COCSADRAFT_173563	Bipolaris	sorokiniana	D	D	K
COCMIDRAFT_104141	Bipolaris	oryzae	D	D	K
COCC4DRAFT_167134	Bipolaris	maydis	D	D	K
COCCADRAFT_32261	Bipolaris	zeicola	D	D	K
COCVIDRAFT_37702	Bipolaris	victoriae	D	D	K
PTT_08190	Pyrenophora	teres	D	D	K
PTRG_02776	Pyrenophora	tritici-repentis	D	D	K
M436DRAFT_36726	Aureobasidium	namibiae	D	D	K
AUEXF2481DRAFT_70618	Aureobasidium	subglaciale	D	D	K
MYCGRDRAFT_44796	Zymoseptoria	tritici	A	D	K
SEPMUDRAFT_151197	Sphaerulina	musiva	Q	D	K
MYCFIDRAFT_204562	Pseudocercospora	fijiensis	S	D	K
BAUCODRAFT_314514	Baudoinia	panamericana	A	D	K
PODANSg1998	Podospora	anserina	D	D	K
NCU02202	Neurospora	crassa	N	D	K
SMAC_03644	Sordaria	macrospora	N	D	K
NEUTE1DRAFT_148210	Neurospora	tetrasperma	N	D	K
VDAG_02974	Verticillium	dahliae	A	D	R
VDBG_02495	Verticillium	alfalfae	A	D	R
CH63R_11050	Colletotrichum	higginsianum	A	D	K
GLRG_10691	Colletotrichum	graminicola	A	D	R
CFIO01_09633	Colletotrichum	fioriniae	A	D	K
CGGC5_4082	Colletotrichum	gloeosporioides	A	D	K
VFPPC_10433	Pochonia	chlamydosporia	S	D	R
MAC_05911	Metarhizium	acridum	S	D	R
MAJ_04798	Metarhizium	majus	S	D	R
MAA_07884	Metarhizium	robertsii	S	D	R
MBR_07868	Metarhizium	brunneum	S	D	R
BBA_05770	Beauveria	bassiana	A	D	R
ISF_05908	Isaria	fumosorosea	A	D	R
CCM_06835	Cordyceps	militaris	S	D	R
TRIVIDRAFT_44706	Trichoderma	virens	A	D	R
TRIREDRAFT_45242	Trichoderma	reesei	A	D	R
TRIATDRAFT_233475	Trichoderma	atroviride	A	D	R
TGAM01_09383	Trichoderma	gamsii	A	D	R
NECHADRAFT_65991	Nectria	haematococca	A	D	R
FOXG_08844	Fusarium	oxysporum	A	D	K
FGSG_05775	Fusarium	graminearum	S	D	K
FVEG_05820	Fusarium	verticillioides	A	D	K
VFPFJ_10249	Purpureocillium	lilacinum	A	D	R
UCRPA7_7969	Phaeoacremonium	minimum	S	D	R
UCREL1_5607	Eutypa	lata	A	D	R
PFICI_02108	Pestalotiopsis	fici	A	D	W
VE01_01695	Pseudogymnoascus	verrucosus	N	D	K
GMDG_06477	Pseudogymnoascus	destructans	N	D	K
LY89DRAFT_312690	Phialocephala	scopiformis	N	D	K
MBM_08307	Marssonina	brunnea	N	D	K
GLAREA_04900	Glarea	lozoyensis	N	D	K
SS1G_04823	Sclerotinia	sclerotiorum	N	D	K
BC1G_11868	Botrytis	cinerea	N	D	K
SPSK_01381	Sporothrix	schenckii	A	D	R
CMQ_87	Grosmannia	clavigera	A	D	R
MGG_15988	Magnaporthe	oryzae	A	D	K
GGTG_11050	Gaeumannomyces	graminis	A	D	R
THITE_2117067	Thielavia	terrestris	N	D	R
MYCTH_2308921	Thermothelomyces	thermophila	A	D	R
CHGG_10971	Chaetomium	globosum	A	D	R
CTHT_0000300	Chaetomium	thermophilum	S	D	R
YALI0A14839g	Yarrowia	lipolytica	D	E	Y
AWJ20_3345	Sugiyamaella	lignohabitans	D	K	C
CAGL0F03245g	[Candida]	glabrata	D	K	Y
TBLA_0A03220	Tetrapisispora	blattae	Q	H	F
Kpol_209p1	Vanderwaltozyma	polyspora	Q	K	Y
TPHA_0H01470	Tetrapisispora	phaffii	Q	K	Y
KLLA0D13266g	Kluyveromyces	lactis	E	K	Y
KLTH0E03828g	Lachancea	thermotolerans	E	K	Y
Ecym_8164	Eremothecium	cymbalariae	E	K	Y
AGOS_ADR293C	Eremothecium	gossypii	E	K	Y
AW171_hschr31607	Eremothecium	sinecaudum	E	K	Y
YHR079C	Saccharomyces	cerevisiae	E	K	Y
DI49_2485	Saccharomyces	eubayanus	E	K	Y
KAFR_0D04760	Kazachstania	africana	S	K	Y
NCAS_0H01740	Naumovozyma	castellii	E	K	Y
NDAI_0C01890	Naumovozyma	dairenensis	E	K	Y
ZYRO0D10472g	Zygosaccharomyces	rouxii	E	K	Y
TDEL_0E02600	Torulaspora	delbrueckii	E	K	Y
WICANDRAFT_28137	Wickerhamomyces	anomalus	E	K	Y
BN7_1176	Wickerhamomyces	ciferrii	D	K	Y
PICMEDRAFT_71073	Pichia	membranifaciens	E	K	Y
OGAPODRAFT_39454	Ogataea	polymorpha	E	R	Y
HPODL_04484	Ogataea	parapolymorpha	E	R	Y
PAS_chr3_1104	Komagataella	phaffii	D	K	Y
BABINDRAFT_170486	Babjeviella	inositovora	D	K	Y
METBIDRAFT_17020	Metschnikowia	bicuspidata	E	K	Y
CLUG_05867	Clavispora	lusitaniae	E	K	Y
QG37_03494	[Candida]	auris	E	K	Y
GNLVRS01_PISO0N07229g	Millerozyma	farinosa	Q	K	Y
GNLVRS01_PISO0M07096g	Millerozyma	farinosa	Q	K	Y
CANTEDRAFT_132201	[Candida]	tenuis	E	K	Y
PGUG_03117	Meyerozyma	guilliermondii	E	K	Y
DEHA2F26224g	Debaryomyces	hansenii	E	K	Y
AC631_04272	Debaryomyces	fabryi	E	K	Y
SPAPADRAFT_133040	Spathaspora	passalidarum	E	K	Y
LELG_00852	Lodderomyces	elongisporus	E	K	C
CTRG_04146	Candida	tropicalis	E	K	Y
CAALFM_C107970CA	Candida	albicans	E	K	Y
CD36_07490	Candida	dubliniensis	E	K	Y
PICST_47968	Scheffersomyces	stipitis	E	K	Y
PHYBLDRAFT_104675	Phycomyces	blakesleeanus	G	D	K
BATDEDRAFT_14363	Batrachochytrium	dendrobatidis	L	D	K
BATDEDRAFT_20725	Batrachochytrium	dendrobatidis	A	E	K
SPPG_05208	Spizellomyces	punctatus	G	D	K
L969DRAFT_50761	Mixia	osmundae	L	D	K
PGTG_22185	Puccinia	graminis	N	D	K
MELLADRAFT_46493	Melampsora	larici-populina	M	E	K
RHOBADRAFT_16870	Rhodotorula	graminis	L	D	K
RHTO_08132	Rhodotorula	toruloides	L	D	K
K437DRAFT_254094	Tilletiaria	anomala	S	N	S
UMAG_03841	Ustilago	maydis	N	D	K
PAN0_011d4370	Moesziomyces	antarcticus	N	D	K
PSEUBRA_SCAF19g03333	Kalmanozyma	brasiliensis	N	D	K
PHSY_000830	Pseudozyma	hubeiensis	N	D	K
PFL1_06479	Anthracocystis	flocculosa	N	D	K
MGL_2052	Malassezia	globosa	A	D	K
MSY001_1129	Malassezia	sympodialis	T	D	K
Malapachy_3550	Malassezia	pachydermatis	A	D	K
A1Q1_04377	Trichosporon	asahii	A	D	K
CC85DRAFT_275074	Cutaneotrichosporon	oleaginosus	A	D	K
TREMEDRAFT_73908	Tremella	mesenterica	S	D	K
L198_02203	Tsuchiyaea	wingfieldii	A	D	K
L202_00578	Cryptococcus	amylolentus	A	D	K
CGB_B5820C	Cryptococcus	gattii	G	D	K
CNAG_03670	Cryptococcus	neoformans	G	D	K
CNBB4040	Cryptococcus	neoformans	G	D	K
CNB01690	Cryptococcus	neoformans	G	D	K
I302_08528	Kwoniella	bestiolae	S	D	K
I203_04983	Kwoniella	mangroviensis	S	D	K
I206_01475	Kwoniella	pini	S	D	K
I303_03841	Kwoniella	dejecticola	S	D	K
AURDEDRAFT_56466	Auricularia	subglabra	N	D	K
CONPUDRAFT_125909	Coniophora	puteana	S	D	K
SERLADRAFT_447884	Serpula	lacrymans	T	D	K
CC1G_06931	Coprinopsis	cinerea	N	D	K
AGABI1DRAFT_60620	Agaricus	bisporus	N	E	K
AGABI2DRAFT_37330	Agaricus	bisporus	N	E	K
Moror_10661	Moniliophthora	roreri	N	D	K
LACBIDRAFT_316978	Laccaria	bicolor	N	D	K
SCHCODRAFT_56776	Schizophyllum	commune	N	D	K
FOMMEDRAFT_109089	Fomitiporia	mediterranea	A	D	K
PUNSTDRAFT_80917	Punctularia	strigosozonata	N	D	K
GLOTRDRAFT_80895	Gloeophyllum	trabeum	T	D	K
HETIRDRAFT_174034	Heterobasidion	irregulare	A	D	K
STEHIDRAFT_96379	Stereum	hirsutum	G	D	K
FIBRA_08847	Fibroporia	radiculosa	N	D	K
TRAVEDRAFT_174175	Trametes	versicolor	T	D	K
DICSQDRAFT_113101	Dichomitus	squalens	M	D	K
PHACADRAFT_254759	Phanerochaete	carnosa	N	D	K
