# Supplementary material for: Protomer alignment modulates specificity of RNA substrate recognition by Ire1
Source: eLife journal article supplement (doi:10.7554/elife.67425), 2021-04-27
Supplement: supp [file elife-67425-supp-v2.zip]

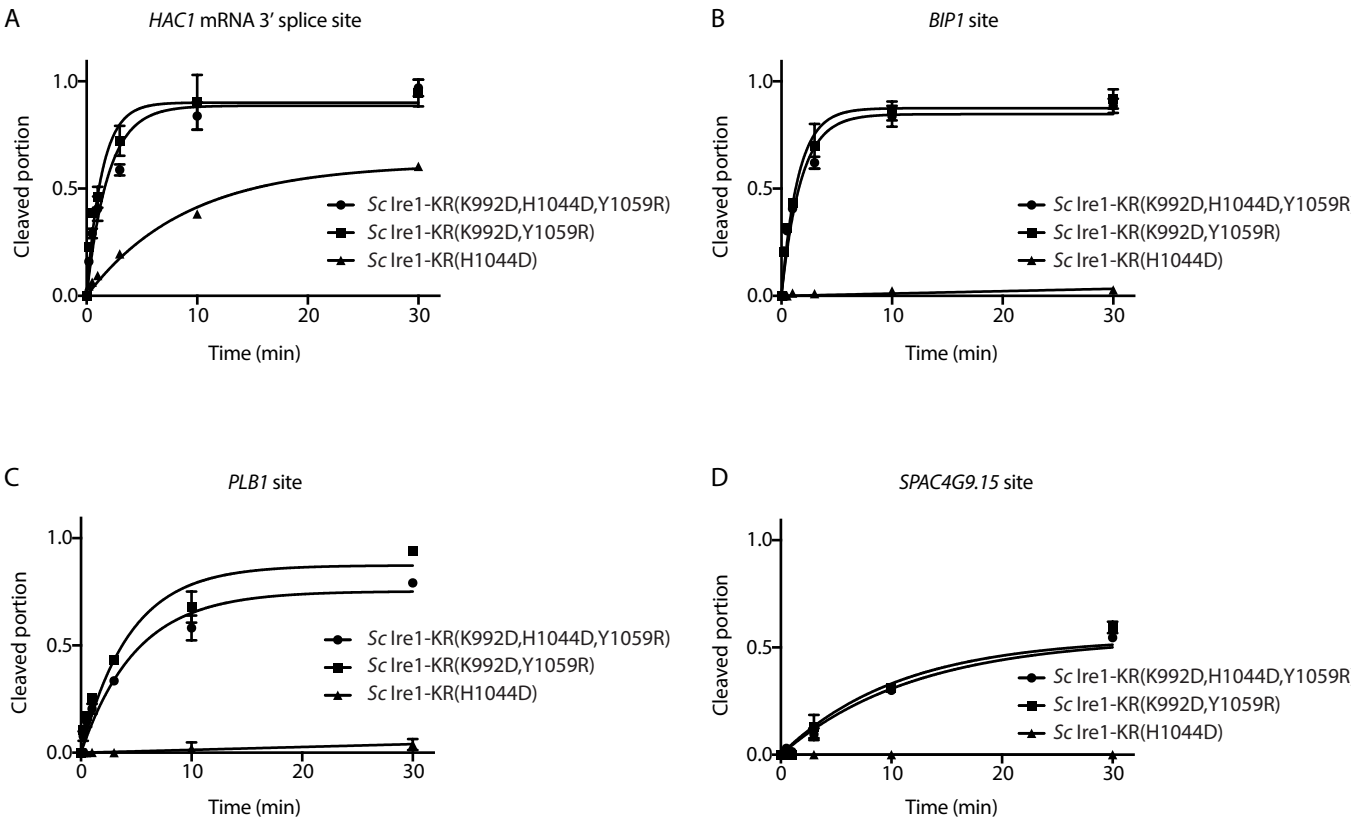

B

*BIP1* site

| Time (min) | Sc Ire1-KR(K992D,H1044D,Y1059R) | Sc Ire1-KR(K992D,Y1059R) | Sc Ire1-KR(H1044D) |
|------------|---------------------------------|--------------------------|--------------------|
| 0          | 0.0                             | 0.0                      | 0.0                |
| 2          | 0.4                             | 0.4                      | 0.0                |
| 5          | 0.7                             | 0.7                      | 0.0                |
| 10         | 0.85                            | 0.85                     | 0.0                |
| 30         | 0.9                             | 0.9                      | 0.0                |

C

*PLB1* site

| Time (min) | Sc Ire1-KR(K992D,H1044D,Y1059R) | Sc Ire1-KR(K992D,Y1059R) | Sc Ire1-KR(H1044D) |
|------------|---------------------------------|--------------------------|--------------------|
| 0          | 0.0                             | 0.0                      | 0.0                |
| 2          | 0.2                             | 0.3                      | 0.0                |
| 5          | 0.5                             | 0.6                      | 0.0                |
| 10         | 0.7                             | 0.75                     | 0.0                |
| 30         | 0.8                             | 0.9                      | 0.0                |

D

*SPAC4G9.15* site

| Time (min) | Sc Ire1-KR(K992D,H1044D,Y1059R) | Sc Ire1-KR(K992D,Y1059R) | Sc Ire1-KR(H1044D) |
|------------|---------------------------------|--------------------------|--------------------|
| 0          | 0.0                             | 0.0                      | 0.0                |
| 2          | 0.1                             | 0.1                      | 0.1                |
| 5          | 0.2                             | 0.2                      | 0.2                |
| 10         | 0.35                            | 0.35                     | 0.35               |
| 30         | 0.55                            | 0.6                      | 0.55               |
