# Supplementary figures and images for: Protomer alignment modulates specificity of RNA substrate recognition by Ire1
Source: eLife journal article supplement (doi:10.7554/elife.67425), 2021-04-27

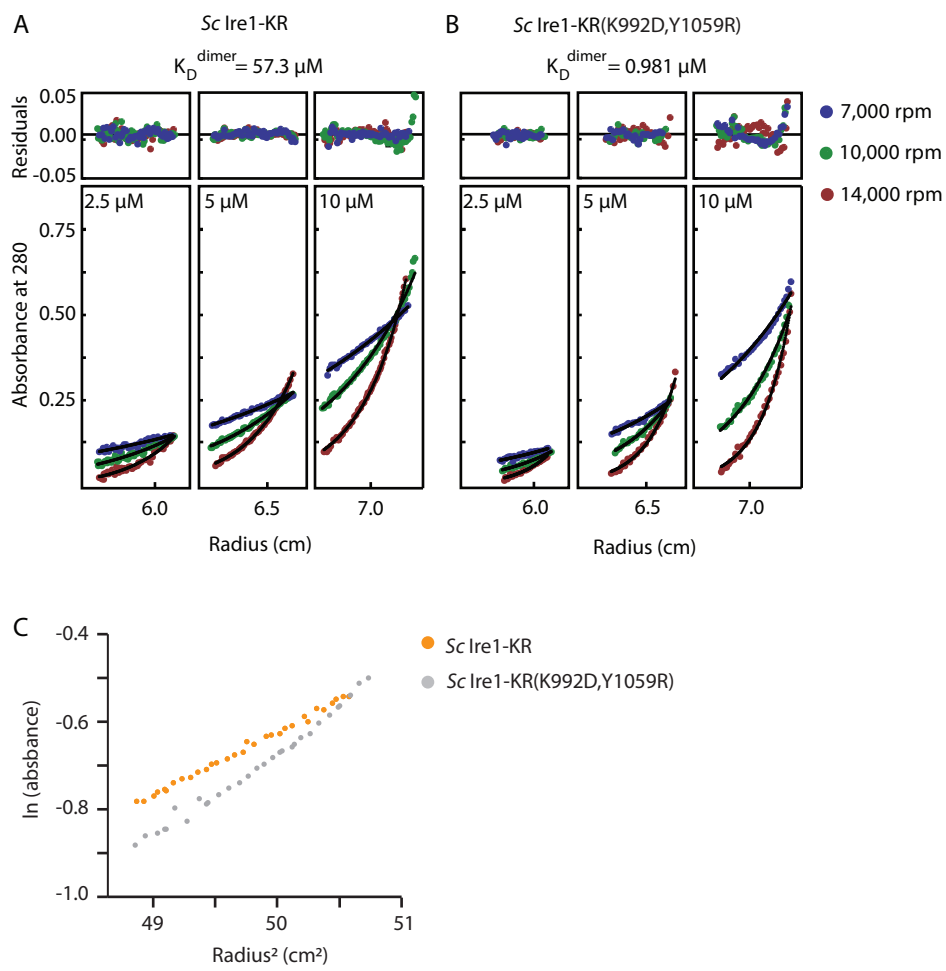

Supplement: supp [file elife-67425-supp-v2.zip]

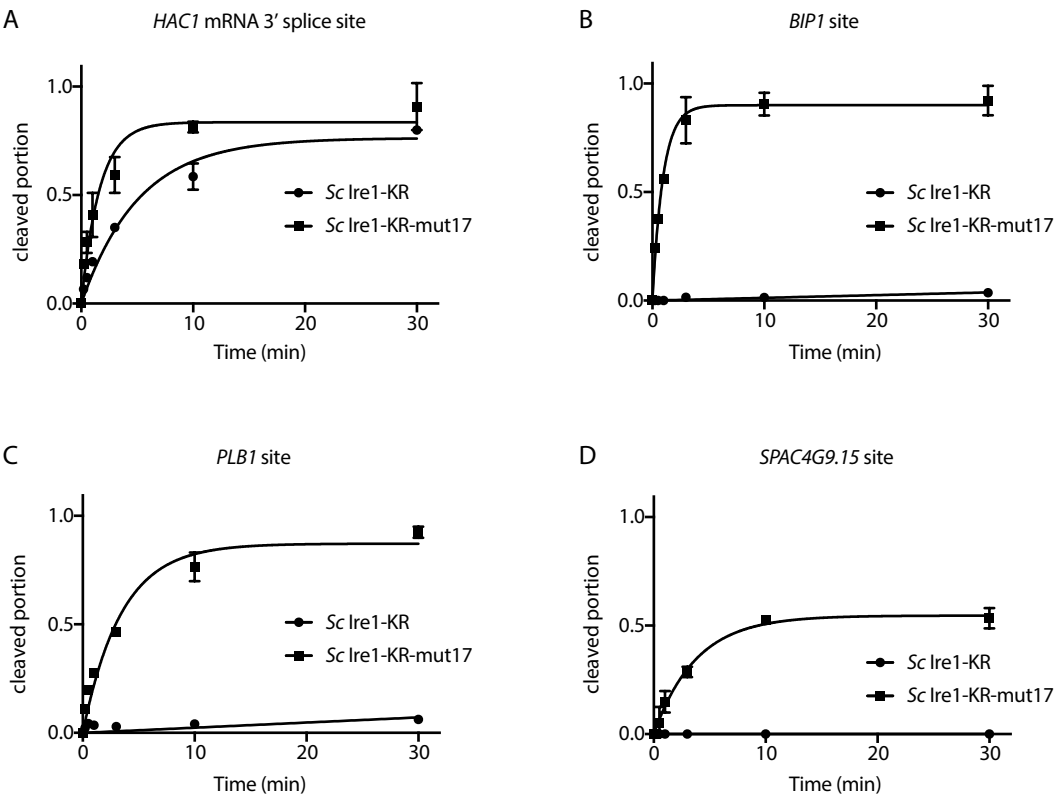

Supplement: supp [file elife-67425-supp-v2.zip]

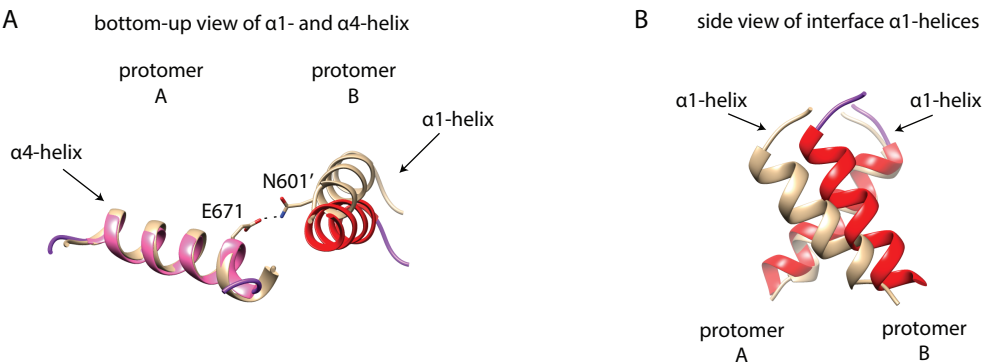

Supplement: supp [file elife-67425-supp-v2.zip]

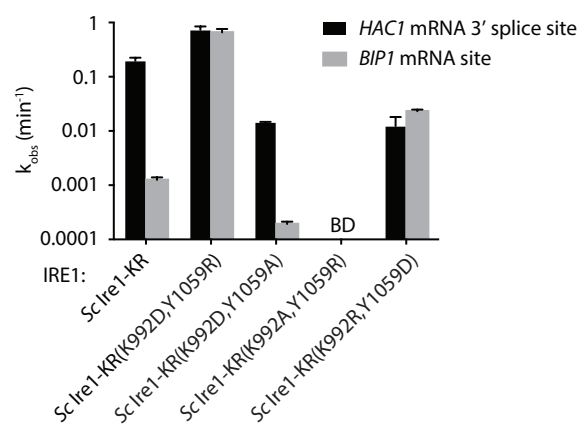

Supplement: supp [file elife-67425-supp-v2.zip]

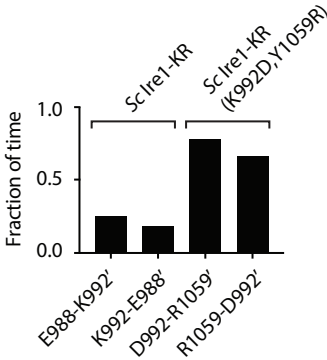

Supplement: supp [file elife-67425-supp-v2.zip]

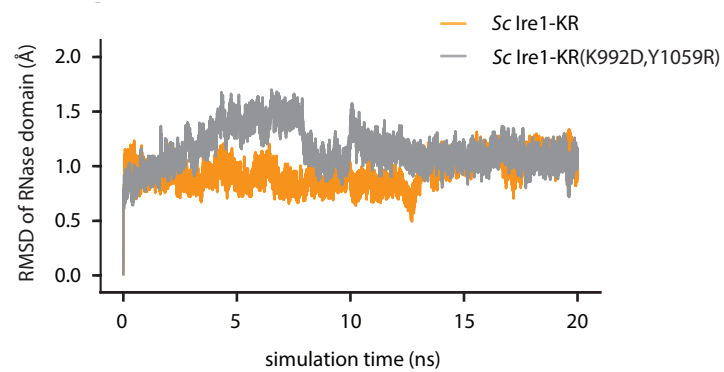

Supplement: supp [file elife-67425-supp-v2.zip]

Figure 1-figure supplement 1 Li & Crotty et al.

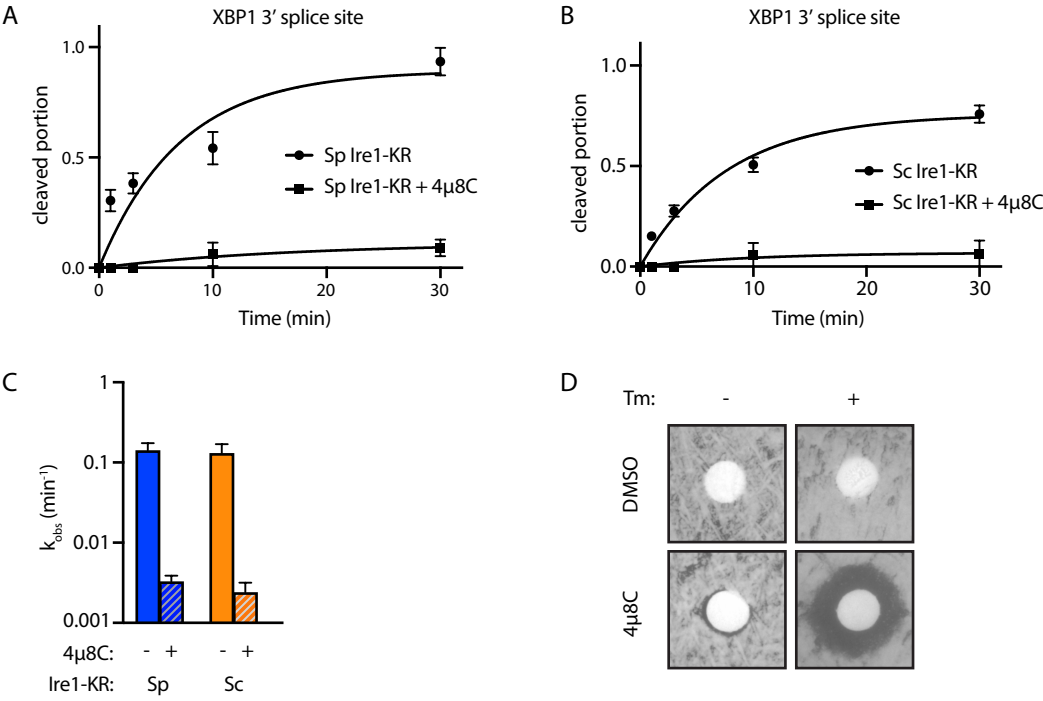

Supplement: supp [file elife-67425-supp-v2.zip]

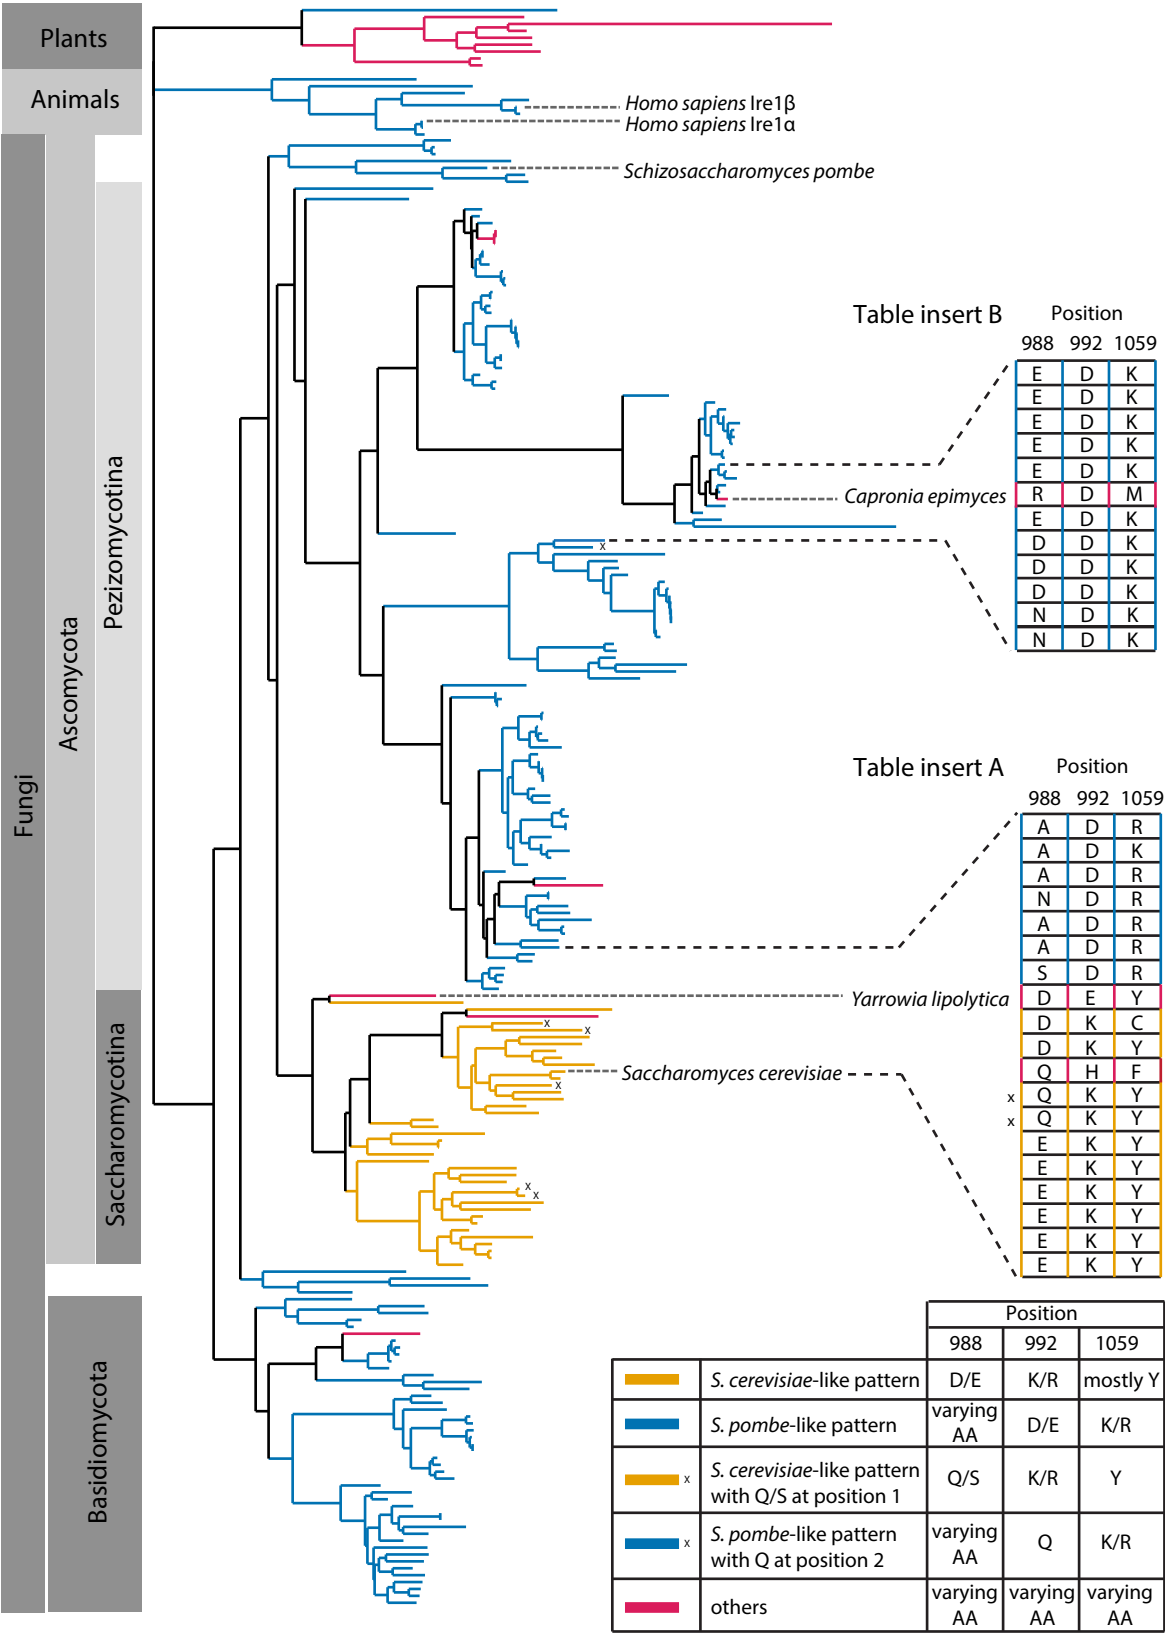

Supplement: supp [file elife-67425-supp-v2.zip]
